# Supplementary material for: Influence of phase transition from order to disorder and Philip's ionicity on the thermal expansion coefficient of pyrochlore type compositions with a multivalent environment
Source: Royal Society of Chemistry journal article supplement (doi:10.1039/c6nj02482c), 2016-11-15
Supplement: c6nj02482c1.pdf [file c6nj02482c1.pdf]

## Electronic Supplementary Information for

### Influence of Phase transition from Order to Disorder and Philip's Ionicity on Thermal Expansion Coefficient of Pyrochlore Type Compositions with Multivalent Environment

Ushakumari A. Renju, Padala Prabhakar Rao\*, Divakaran S. Vaisakhan Thampi

Materials Science and Technology Division,  
CSIR-National Institute for Interdisciplinary Science and Technology,  
Trivandrum-695019, India

1. Table 1: Factor Group analysis for Pyrochlore structure

| Modes      | Distribution of degrees of freedom             |                               |                              | Number of normal modes |               |                 |
|------------|------------------------------------------------|-------------------------------|------------------------------|------------------------|---------------|-----------------|
|            | A and B cations<br>D <sub>3d</sub><br>16c, 16d | X anion<br>C <sub>2</sub> 48f | O anion<br>T <sub>d</sub> 8a | Acoustic modes         | Lattice modes | Selection rules |
| <b>A1g</b> | 0                                              | 1                             | 0                            | 0                      | 1             | Raman           |
| <b>A2g</b> | 0                                              | 0                             | 0                            | 0                      | 0             | Inactive        |
| <b>Eg</b>  | 0                                              | 1                             | 0                            | 0                      | 1             | Raman           |
| <b>T1g</b> | 0                                              | 2                             | 0                            | 0                      | 2             | Inactive        |
| <b>T2g</b> | 0                                              | 3                             | 1                            | 0                      | 4             | Raman           |
| <b>A1u</b> | 0                                              | 0                             | 0                            | 0                      | 0             | Inactive        |
| <b>A2u</b> | 2                                              | 1                             | 0                            | 0                      | 3             | Inactive        |
| <b>Eu</b>  | 2                                              | 1                             | 0                            | 0                      | 3             | Inactive        |
| <b>T1u</b> | 4                                              | 3                             | 1                            | 1                      | 7             | Infrared        |
| <b>T2u</b> | 2                                              | 2                             | 0                            | 0                      | 4             | Inactive        |

The factor group analysis of pyrochlore structured compositions is shown in Table 1.

#### 2. Fractional Ionicity Calculation: Equations

$$E_h^{\mu} = \frac{39.74}{(d^{\mu})^{2.48}}$$

For any binary crystals A<sub>m</sub>B<sub>n</sub> type compounds, the hetero polar C<sup>μ</sup> parts can be calculated as follows:

$$C^\mu = 14.4b^\mu \exp(-k_s^\mu r_0^\mu) \left[ Z_A^\mu - \frac{n}{m} Z_B^\mu \right] \frac{1}{r_0^\mu}$$

**Where  $n > m$**

$$C^\mu = 14.4b^\mu \exp(-k_s^\mu r_0^\mu) \left[ \frac{m}{n} Z_A^\mu - Z_B^\mu \right] \frac{1}{r_0^\mu}$$

**Where  $m > n$**

$$b^\mu = b(N_c^\mu)^2$$

**Where**

$$k_s^\mu = \left( \frac{4k_f^\mu}{\Pi a_B} \right)^{\frac{1}{2}}$$

$$k_f^\mu = (3\Pi^2 N_e^\mu)^{\frac{1}{3}}$$

$$r_0^\mu = \frac{d^\mu}{2}$$

$a_B$  is the Bohr radius (in Å) and  $d^\mu$  is the bond distance (in Å). The units of  $E_h^\mu$  and  $C^\mu$  are in electron volts. The hetero polar energy gives a measure for the difference of screened coulomb potentials of the two atoms composing the bond or interaction of the point charges while the homo polar energy is a measure of the interaction of dipole and other multiple moments.<sup>1</sup>  $\exp(-k_s^\mu r_0^\mu)$  is the Thomas-Fermi screening factor.  $k_f^\mu$  is the Fermi wave vector.  $b^\mu$  is the correction factor proportional to the square of the average coordination number  $N_c^\mu$ .

$$b^\mu = \beta(N_c^\mu)^2$$

$$N_c^\mu = \frac{m}{m+n}N_{CA}^\mu + \frac{n}{m+n}N_{CB}^\mu$$

$\beta$  is 0.089.<sup>2</sup>  $N_{CA}^\mu$  is the coordination number of the  $\mu$  type of bond for cation A, and  $N_{CB}^\mu$  is the coordination number of the bond for anion B.  $N_e^\mu$  is the number of valence electrons of the  $\mu$  type of bond per cubic centimetre.

$$N_e^\mu = \frac{n_e^\mu}{\vartheta_b^\mu}$$

$$n_e^\mu = \frac{Z_A^\mu}{N_{CA}^\mu} + \frac{Z_B^\mu}{N_{CB}^\mu}$$

Where  $n_e^\mu$  is the number of effective valence electrons per  $\mu$  bond and  $\vartheta_b^\mu$  is the bond volume.

$$\vartheta_b^\mu = \frac{(d^\mu)^3}{\sum_v (d^v)^3 N_b^v}$$

$N_b^v$  is the number of bonds per cubic centimetre, which is obtained from the crystal structure

- 1 Z. J. Wu and S. Y. Zhang, *J. Phys. Chem. A*, 1999, **103**, 4270–4274.
- 2 B. F. Levine, *J. Chem. Phys.*, 1973, **59**, 1463.
